# Supplementary material for: Gene Conversion Drives the Evolution of HINTW, an Ampliconic Gene on the Female-Specific Avian W Chromosome
Source: Oxford University Press journal article supplement (doi:10.1093/molbev/msi198), 2005-06-22
Supplement: msi198_Supplementary_Data.zip [file msi198_Supplementary_Data.zip]

**Supplementary Table 1.** A list of reference genes analysed in this study.

| Gene                 | Accession number/genomic position      |
|----------------------|----------------------------------------|
| Chicken W chromosome |                                        |
| <i>ATPA1W</i>        | AF165968, AF301554, AF301566, AF301578 |
| <i>CHD1W</i>         | chrW:119324-154298                     |
| <i>FET1W</i>         | AY113681                               |
| <i>HINTW</i>         | AB026678                               |
| <i>IDN3W</i>         | chrW:4895795-4915038                   |
| <i>MADH2W</i>        | chrW_random:30295-70678                |
| <i>RASA1W</i>        | chrW_random:230045-256483              |
| <i>SPINW</i>         | chrW:46172-102390                      |
| <i>UBAP2W</i>        | chrW_random:98337-167584               |
| Chicken Z chromosome |                                        |
| <i>CHD1Z</i>         | NM_204941                              |
| <i>HINTZ</i>         | AB026676                               |
| <i>IDN3Z</i>         | chrZ_random:10359307-10362789          |
| <i>MADH2Z</i>        | chrZ:93350-113394                      |
| <i>RASA1Z</i>        | chrZ:31304002-31319694                 |
| <i>SPINZ</i>         | chrZ:9440955-9483829                   |
| <i>UBAP2Z</i>        | chrZ_random:7019616-7036844            |
| Human Y chromosome   |                                        |

|               |                        |
|---------------|------------------------|
| <i>BPY2</i>   | chrY:25617418-25622631 |
| <i>CDY</i>    | BC069087               |
| <i>DAZ</i>    | chrY:24217676-24276834 |
| <i>DBY</i>    | chrY:14025513-14038699 |
| <i>EIF1AY</i> | chrY:21586676-21596645 |
| <i>PRY</i>    | chrY:27044694-27057214 |
| <i>RPS4Y</i>  | chrY:2341190-2380065   |
| <i>SMCY</i>   | AF273841               |
| <i>TB4Y</i>   | chrY:14824881-14825804 |
| <i>TSPY</i>   | chrY:8878075-8880655   |
| <i>TTY1</i>   | chrY:5961428-5961610   |
| <i>TTY2</i>   | chrY:9192288-9192361   |
| <i>USP9Y</i>  | chrY:13672721-13980006 |
| <i>UTY</i>    | chrY:14370401-14426651 |
| <i>XKRY</i>   | NM_004677              |
| <i>ZFY</i>    | chrY:2467108-2493164   |

---

**Supplementary Table 2.** Number of sequence variants of *HINTW* from genomic sequence reads of chicken. The minimum number of differences for interpreting any two reads as representing different variants is 1, 2 or 3 bp.

|          | Functional  |             |             | Non-functional/Intronic |             |             |
|----------|-------------|-------------|-------------|-------------------------|-------------|-------------|
|          | $\geq 1$ bp | $\geq 2$ bp | $\geq 3$ bp | $\geq 1$ bp             | $\geq 2$ bp | $\geq 3$ bp |
| Exon 1   | 21          | 13          | 7           | 32                      | 28          | 25          |
| Exon 2   | 14          | 5           | 1           | 36                      | 20          | 10          |
| Exon 3   | 27          | 14          | 8           | 19                      | 19          | 18          |
| Intron 1 |             |             |             | 25                      | 18          | 14          |
| Intron 2 |             |             |             | 45                      | 35          | 26          |
